# Supplementary material for: Potential mechanism and key genes involved in mechanical ventilation and lipopolysaccharide-induced acute lung injury
Source: PubMed Central journal article supplement — Mol Med Rep. 2020 Sep 14;22(5):4265–77. doi: 10.3892/mmr.2020.11507 (PMC7533521; doi:10.3892/mmr.2020.11507), 2020-09-14
Supplement: Supplementary_Data.pdf [file Supplementary_Data.pdf]

Table SI. Primer sequences for quantitative PCR.

| Name      | Sequences (5'→3')        |
|-----------|--------------------------|
| Adora2b-F | GGACCACTCCAGGACCACTCTC   |
| Adora2b-R | AATTGGCATGTGACAGGAGGATGG |
| Hcar2-F   | CATCTGCCTGCCGTTCCCTGAC   |
| Hcar2-R   | GATGATGCTGCCCTGTCCGGTTC  |
| Zbtb16-F  | GCGACTGGCTGGGACTTTGTG    |
| Zbtb16-R  | GCTGGCTGTTTCGGTGGAAGAG   |
| Egr1-F    | GCCAGGAGTGATGAACGCAAGAG  |
| Egr1-R    | GAGCCAGGAGAGGAGTAGGAAGTG |
| Atf3-F    | GCTTCAACATCCAGGCCAGGTC   |
| Atf3-R    | AGAGGACATCCGATGGCAGAGG   |
| Cxcl10-F  | CCGCTGCAACTGCATCCATA     |
| Cxcl10-R  | GGATAGGCTCGCAGGGATGA     |
| Cxcl2-F   | CACTGGTCCTGCTGCTGCTG     |
| Cxcl2-R   | GGCGTCACACTCAAGCTCTGG    |
| Cxcl3-F   | CACTGGTCCTGCTGCTGCTG     |
| Cxcl3-R   | CGTCACCGTCAAGCTCTGGATG   |
| Fpr1-F    | GCTCAGAACCACCGCACTGTG    |
| Fpr1-R    | ACGGCCACCTTCCTCTTCTCTAC  |
| Nfkb1-F   | GACACGACAGAATCCTCAGCATCC |
| Nfkb1-R   | CCACCAGCAGCAGCAGACATG    |
| β-Actin-F | CTGTATGCCTCTGGTCGTAC     |
| β-Actin-R | TGATGTCACGCACGATTTCC     |

F, Forward; R, Reverse.

Table SII. Prediction of drug-gene interactions.

| Drug                 | Gene  | Interaction type                | Source                                                                    | PMID                                                       |
|----------------------|-------|---------------------------------|---------------------------------------------------------------------------|------------------------------------------------------------|
| Siltuximab           | IL6   | Inhibitor, antibody, antagonist | MyCancerGenome, ChembIInteractions, DrugBank                              | 8823310                                                    |
| Danazol              | CCL2  | Inhibitor                       | DrugBank                                                                  | 11056242, 11216879                                         |
| Niacin               | HCAR2 | Agonist                         | TdgClinicalTrial, GuideToPharmacologyInteractions, DrugBank, TTD          | 16018973, 12522134, 12646212, 16099840, 15580557           |
| Carvedilol           | SELE  | Inhibitor                       | DrugBank                                                                  | 15374848                                                   |
| Rilonacept           | IL1A  | Binder                          | TdgClinicalTrial, TEND, DrugBank                                          | 23319019, 23553601                                         |
| Rilonacept           | IL1RN | Binder                          | DrugBank                                                                  | 23319019, 12815153                                         |
| Canakinumab          | IL1B  | Antibody, binder, inhibitor     | MyCancerGenome, TdgClinicalTrial, ChembIInteractions, TEND, DrugBank, TTD | 19169963                                                   |
| Gallium nitrate      | IL1B  | Inhibitor, antagonist           | DrugBank, TTD                                                             | 16122880                                                   |
| Rilonacept           | IL1B  | Binder, inhibitor               | ChembIInteractions, DrugBank, TTD                                         | 23319019, 23553601                                         |
| Lenalidomide         | PTGS2 | Negative modulator              | DrugBank                                                                  | 15598423, 12720152                                         |
| Piroxicam            | PTGS2 | Inhibitor                       | TdgClinicalTrial, ChembIInteractions, DrugBank, TTD                       | 11952155, 11785774, 11153163, 11752352, 15464832, 10381057 |
| Diflunisal           | PTGS2 | Inhibitor                       | TdgClinicalTrial, ChembIInteractions, TEND, DrugBank, TTD                 | 11315375, 8737748, 12852483, 11673972, 10825891, 11752352  |
| Salsalate            | PTGS2 | Inhibitor                       | TdgClinicalTrial, TEND, DrugBank                                          | 9711054, 10452868, 16808554, 12901032                      |
| Pomalidomide         | PTGS2 | Inhibitor                       | DrugBank                                                                  | 17308870                                                   |
| Indomethacin         | PTGS2 | Inhibitor                       | ChembIInteractions, TEND, DrugBank                                        | 15668944, 15730717, 15831440, 15770365, 15667901           |
| Nabumetone           | PTGS2 | Inhibitor                       | TdgClinicalTrial, ChembIInteractions, TEND, DrugBank, TTD                 | 11304699, 12047490, 11153163, 11752352, 15456329, 7615202  |
| Mefenamic acid       | PTGS2 | Inhibitor                       | TdgClinicalTrial, ChembIInteractions, TEND, DrugBank, TTD                 | 10393680, 15792781, 9626023, 17150210, 7832763, 11752352   |
| Etodolac             | PTGS2 | Inhibitor                       | TdgClinicalTrial, ChembIInteractions, TEND, DrugBank, TTD                 | 12824918, 11009046, 11275997, 11752352, 10594327, 15198222 |
| Antipyrine           | PTGS2 | Inhibitor                       | DrugBank                                                                  | 11695253                                                   |
| Tenoxicam            | PTGS2 | Inhibitor                       | TdgClinicalTrial, TEND, DrugBank, TTD                                     | 11563332, 16245223, 9152412, 11752352, 15943176, 15756931  |
| Balsalazide disodium | PTGS2 | Inhibitor                       | ChembIInteractions, DrugBank                                              | 17981262, 12950415, 17139284, 17016423, 19743890           |
| Oxaprozin            | PTGS2 | Inhibitor                       | TdgClinicalTrial, ChembIInteractions, TEND, DrugBank                      | 19338579, 9831331, 9650852, 19952416, 12065695, 17024689   |
| Nepafenac            | PTGS2 | Inhibitor                       | TdgClinicalTrial, ChembIInteractions, TEND, DrugBank                      | 10850857                                                   |
| Carprofen            | PTGS2 | Inhibitor                       | TdgClinicalTrial, ChembIInteractions, TEND, DrugBank, TTD                 | 15939622, 11752352, 17181139, 11703020, 15198222, 10895904 |

Table SII. Continued.

| Drug                | Gene    | Interaction type | Source                                                              | PMID                                                                 |
|---------------------|---------|------------------|---------------------------------------------------------------------|----------------------------------------------------------------------|
| Ketoprofen          | PTGS2   | Inhibitor        | TdgClinicalTrial, ChemblInteractions, TEND, DrugBank, TTD           | 14513718, 11729362, 11752352, 11814865, 15198222, 10895904           |
| Tiaprofenic acid    | PTGS2   | Inhibitor        | TdgClinicalTrial, TEND, DrugBank, TTD                               | 2277128, 11752352, 17139284, 17016423                                |
| Etoricoxib          | PTGS2   | Inhibitor        | PharmGKB, TdgClinicalTrial, ChemblInteractions, TEND, DrugBank, TTD | 17573128, 17164136, 17691997, 11752352, 17139284, 17016423           |
| Lornoxicam          | PTGS2   | Inhibitor        | DrugBank                                                            | 20399943, 10450786, 17516707, 11846620                               |
| Sulindac            | PTGS2   | Inhibitor        | TdgClinicalTrial, ChemblInteractions, TEND, DrugBank                | 11118042, 10372826, 10657949, 10485483, 11078056                     |
| Nimesulide          | PTGS2   | Inhibitor        | PharmGKB, DrugBank, TTD                                             | 16846549, 11752352                                                   |
| Salicylic acid      | PTGS2   | Inhibitor        | TdgClinicalTrial, TEND, DrugBank                                    | 15035793, 15348270, 15070163, 15199473, 17259377, 5284360, 15106733  |
| Naproxen            | PTGS2   | Inhibitor        | TdgClinicalTrial, ChemblInteractions, TEND, DrugBank, TTD           | 17604186, 17612049, 17607546, 11752352, 17521299, 17532719           |
| Parecoxib           | PTGS2   | Inhibitor        | TdgClinicalTrial, DrugBank                                          | 10794682                                                             |
| Thalidomide         | PTGS2   | Antagonist       | TdgClinicalTrial, DrugBank                                          | 12710892, 15446566, 15982930, 21507989, 15598423, 15892618           |
| Aminosalicylic acid | PTGS2   | Inhibitor        | DrugBank                                                            | 16855178, 12463455, 14742690, 12208114, 9256165                      |
| Aspirin             | PTGS2   | Inhibitor        | TdgClinicalTrial, ChemblInteractions, CIViC, TEND, DrugBank         | 17522398, 17181859, 17258197, 17301265, 11752352, 17037745, 17033106 |
| Mesalamine          | PTGS2   | Inhibitor        | TdgClinicalTrial, ChemblInteractions, TEND, DrugBank                | 16855178, 12463455, 14742690, 12208114, 9256165                      |
| Sulfasalazine       | PTGS2   | Inhibitor        | TdgClinicalTrial, ChemblInteractions, DrugBank                      | 16855178, 12463455, 14742690, 12208114, 9256165                      |
| Meloxicam           | PTGS2   | Inhibitor        | TdgClinicalTrial, ChemblInteractions, TEND, DrugBank, TTD           | 10567199, 10220944, 11752352, 10381787, 10340919, 10381057           |
| Acetylcysteine      | SLC7A11 | Activator        | DrugBank                                                            | 21118657                                                             |
| Sulfasalazine       | SLC7A11 | Inhibitor        | DrugBank                                                            | 11752352, 11587223                                                   |
| Riluzole            | SLC7A11 | Inducer          | TdgClinicalTrial, DrugBank                                          | 10899284, 20226190, 12629173, 20059984, 8813989                      |
| Pomalidomide        | TNF     | Inhibitor        | DrugBank                                                            | 22917017                                                             |

Table SII. Continued.

| Drug               | Gene    | Interaction type                 | Source                                                                                     | PMID                                                                                                         |
|--------------------|---------|----------------------------------|--------------------------------------------------------------------------------------------|--------------------------------------------------------------------------------------------------------------|
| Infliximab         | TNF     | Antibody, inhibitor              | PharmGKB, TdgClinicalTrial, ChemblInteractions, TEND, DrugBank, TTD                        | 16456024, 16052578, 12110154, 15481318, 15691299, 15674127, 15804598, 11752352, 15691217, 17642244, 16622728 |
| Thalidomide        | TNF     | Inhibitor                        | TdgClinicalTrial, TEND, DrugBank, TTD                                                      | 8755512, 12046682, 12167383, 12105857, 12102294, 11752352, 12113124                                          |
| Certolizumab pegol | TNF     | Inhibitor, antibody, neutralizer | TdgClinicalTrial, ChemblInteractions, TEND, DrugBank, TTD                                  | 23620660                                                                                                     |
| Adalimumab         | TNF     | Inhibitor, antibody              | PharmGKB, TdgClinicalTrial, ChemblInteractions, TEND, DrugBank, TTD                        | 12044041, 15022409, 14532145, 15046527, 11752352, 15200343                                                   |
| Inamrinone         | TNF     | Inhibitor                        | DrugBank                                                                                   | 11805217, 1611705, 10075051, 11969359, 10444479                                                              |
| Etanercept         | TNF     | Inhibitor, antibody              | PharmGKB, TdgClinicalTrial, ChemblInteractions, TEND, DrugBank, TTD                        | 10375846, 10405518, 10206649, 11752352, 10338381, 10357816                                                   |
| Golimumab          | TNF     | Inhibitor, antibody              | TdgClinicalTrial, ChemblInteractions, TEND, DrugBank, TTD                                  | 21079302                                                                                                     |
| Dalteparin sodium  | SELP    | Inhibitor                        | DrugBank                                                                                   | 11044537                                                                                                     |
| Carvedilol         | GJAI    | Other                            | NCI, DrugBank                                                                              | 16448880, 16563290                                                                                           |
| Sucralfate         | FGG     | Antagonist                       | DrugBank                                                                                   | 6892775                                                                                                      |
| Thalidomide        | ORM1    | Binder                           | DrugBank                                                                                   | 8755512                                                                                                      |
| Theophylline       | ADORA2B | Antagonist                       | TdgClinicalTrial, GuideToPharmacologyInteractions, ChemblInteractions, TEND, DrugBank      | 12954362, 16545350, 15980878, 11752352, 3588607, 16581066                                                    |
| Misoprostol        | PTGER4  | Agonist                          | GuideToPharmacologyInteractions, DrugBank                                                  | 18472336, 16039053, 11993717, 12097143, 9313928, 11602631                                                    |
| Dinoprostone       | PTGER4  | Agonist                          | TdgClinicalTrial, GuideToPharmacologyInteractions, TEND, DrugBank                          | 17329241, 16545798, 18715952, 20599704, 19788928                                                             |
| Menadione          | PROZ    | Activator                        | TEND, DrugBank                                                                             | 17139284, 17016423                                                                                           |
| Carvedilol         | VCAM1   | Inhibitor                        | DrugBank                                                                                   | 17139284, 15374848, 17016423                                                                                 |
| Belatacept         | CD86    | Inhibitor                        | TdgClinicalTrial, GuideToPharmacologyInteractions, ChemblInteractions, DrugBank            | 18269922                                                                                                     |
| Abatacept          | CD86    | Binder, antagonist, inhibitor    | TdgClinicalTrial, GuideToPharmacologyInteractions, ChemblInteractions, TEND, DrugBank, TTD | 18041889, 17020493, 16971318, 16932686, 17212998, 11752352, 16357751, 16573350, 20080922                     |
| Atezolizumab       | CD274   | Inhibitor, antibody              | MyCancerGenome, ChemblInteractions, CGI, CIViC, DrugBank, CancerCommons, FDA               | 26970723, 26918451, 28472902                                                                                 |
| Avelumab           | CD274   | Antibody                         | MyCancerGenome, ChemblInteractions, CIViC, FDA                                             | 26918451, 28472902                                                                                           |
| Arsenic trioxide   | TXNRD1  | Inhibitor                        | TdgClinicalTrial, ChemblInteractions, TEND, DrugBank                                       | 17640917                                                                                                     |
| Carvedilol         | HIF1A   | Modulator                        | DrugBank                                                                                   | 15732037                                                                                                     |

Table SII. Continued.

| Drug                  | Gene   | Interaction type            | Source                                                                                                                           | PMID                                                                                                                                                                                                                                                                                                                                                                                                 |
|-----------------------|--------|-----------------------------|----------------------------------------------------------------------------------------------------------------------------------|------------------------------------------------------------------------------------------------------------------------------------------------------------------------------------------------------------------------------------------------------------------------------------------------------------------------------------------------------------------------------------------------------|
| Canagliflozin         | SLC5A1 | Inhibitor                   | GuideToPharmacologyInteractions, DrugBank                                                                                        | 23590413                                                                                                                                                                                                                                                                                                                                                                                             |
| Ruxolitinib           | JAK2   | Inhibitor                   | MyCancerGenome, TdgClinicalTrial, OncoKB, CKB, GuideToPharmacologyInteractions, CGI, DrugBank, DoCM, MyCancerGenomeClinicalTrial | 18805579, 16293597, 24398328, 25260694, 25515960, 20339092, 21926964, 23400675, 22829971, 15781101, 16081687, 22271575, 22955920, 20631743, 25207766, 19287384, 20585391, 21120162, 22041374, 16709929, 24251790, 23061804, 22875628, 19470474, 18394554, 21689158, 23115274, 21393331, 23514013, 22368270, 25157968, 22818858, 23630205, 24986690, 24404189, 22422826, 26472029, 22899477, 22571758 |
| Tofacitinib           | JAK2   | Inhibitor, antagonist       | DrugBank                                                                                                                         | 10592235                                                                                                                                                                                                                                                                                                                                                                                             |
| Thalidomide           | NFKB1  | Antagonist                  | TdgClinicalTrial, TEND, DrugBank                                                                                                 | 11752352, 15723633                                                                                                                                                                                                                                                                                                                                                                                   |
| Glucosamine           | NFKB2  | Antagonist                  | DrugBank                                                                                                                         | 12681956                                                                                                                                                                                                                                                                                                                                                                                             |
| Aspirin               | NFKB2  | Antagonist                  | DrugBank                                                                                                                         | 8052854                                                                                                                                                                                                                                                                                                                                                                                              |
| Lumacaftor            | CFTR   | Modulator                   | TdgClinicalTrial, ChemblInteractions, DrugBank, FDA                                                                              | 26416827                                                                                                                                                                                                                                                                                                                                                                                             |
| Glyburide             | CFTR   | Channel blocker, antagonist | GuideToPharmacologyInteractions, DrugBank                                                                                        | 12407077, 12202948, 12391048, 14729151, 15365090                                                                                                                                                                                                                                                                                                                                                     |
| Bumetadine            | CFTR   | Antagonist                  | DrugBank                                                                                                                         | 9886939                                                                                                                                                                                                                                                                                                                                                                                              |
| Crofelemer            | CFTR   | Antagonist, inhibitor       | TdgClinicalTrial, GuideToPharmacologyInteractions, ChemblInteractions, DrugBank                                                  | 19808995                                                                                                                                                                                                                                                                                                                                                                                             |
| Ivacaftor             | CFTR   | Potentiator, activator      | PharmGKB, TdgClinicalTrial, GuideToPharmacologyInteractions, ChemblInteractions, DrugBank, FDA                                   | 22293084                                                                                                                                                                                                                                                                                                                                                                                             |
| Lisinopril            | ACE2   | Inhibitor                   | TdgClinicalTrial, DrugBank                                                                                                       | 11030016, 11929321, 11752352, 1536695                                                                                                                                                                                                                                                                                                                                                                |
| Sargramostim          | CSF2RB | Agonist                     | TdgClinicalTrial, ChemblInteractions, TEND, DrugBank                                                                             | 17139284, 17016423, 1424804                                                                                                                                                                                                                                                                                                                                                                          |
| Dasatinib             | EPHA2  | Inhibitor, antagonist       | TdgClinicalTrial, ChemblInteractions, CGI, TEND, DrugBank, DoCM, MyCancerGenomeClinicalTrial                                     | 19010823, 19861960, 20360610, 20072833, 18047674, 17139284, 17016423                                                                                                                                                                                                                                                                                                                                 |
| Acetoxhydroxamic acid | MMP12  | Inhibitor                   | DrugBank                                                                                                                         | 16899369, 15809432, 17269766, 16959356                                                                                                                                                                                                                                                                                                                                                               |
| Rivaroxaban           | F10    | Antagonist, inhibitor       | TdgClinicalTrial, GuideToPharmacologyInteractions, ChemblInteractions, DrugBank                                                  | 20135071, 20424181, 10592235                                                                                                                                                                                                                                                                                                                                                                         |

Table SII. Continued.

| Drug                  | Gene    | Interaction type               | Source                                                                               | PMID                                                                           |
|-----------------------|---------|--------------------------------|--------------------------------------------------------------------------------------|--------------------------------------------------------------------------------|
| Apixaban              | F10     | Inhibitor                      | TdgClinicalTrial, GuideToPharmacologyInteractions, ChemblInteractions, DrugBank, TTD | 17371192, 18393142                                                             |
| Edoxaban              | F10     | Inhibitor                      | TdgClinicalTrial, GuideToPharmacologyInteractions, DrugBank                          | 18096568                                                                       |
| Fondaparinux sodium   | F10     | Inhibitor                      | DrugBank, TTD                                                                        | 19825921                                                                       |
| Menadione             | F10     | Activator                      | TEND, DrugBank                                                                       | 17139284, 17016423                                                             |
| Interferon alfa-2A    | IFNAR2  | Agonist                        | ChemblInteractions, TEND, DrugBank                                                   | 18230610, 15898717                                                             |
| Peginterferon alfa-2B | IFNAR2  | Binder, agonist                | GuideToPharmacologyInteractions, ChemblInteractions, DrugBank, TTD                   | 16953837, 11752352, 17139284, 17016423, 15898717, 19955815                     |
| Interferon beta-1A    | IFNAR2  | Agonist, binder                | ChemblInteractions, DrugBank, TTD                                                    | 16912135, 11747625                                                             |
| Interferon beta-1B    | IFNAR2  | Binder, agonist                | ChemblInteractions, TEND, DrugBank, TTD                                              | 10049744, 11752352                                                             |
| Interferon alfacon-1  | IFNAR2  | Agonist, binder                | ChemblInteractions, TEND, DrugBank, TTD                                              | 12528473, 8836913, 11752352                                                    |
| Interferon alfa-N3    | IFNAR2  | Binder, agonist                | ChemblInteractions, TEND, DrugBank, TTD                                              | 16953837, 11752352, 17139284, 17016423, 15898717, 19955815                     |
| Interferon alfa-2B    | IFNAR2  | Agonist, binder                | ChemblInteractions, TEND, DrugBank                                                   | 11752352, 17139284, 17016423, 7584665                                          |
| Peginterferon alfa-2A | IFNAR2  | Binder, agonist                | ChemblInteractions, DrugBank, TTD                                                    | 16953837, 11752352, 15898717, 19955815                                         |
| Glutamine             | GLUL    | Product of                     | DrugBank                                                                             | 16382338, 16326016, 16547651, 16530878, 16484281                               |
| Quinethazone          | SLC12A2 | Inhibitor                      | DrugBank                                                                             | 19474192, 19636250, 12538756, 20528637                                         |
| Bumetadine            | SLC12A2 | Inhibitor                      | TdgClinicalTrial, GuideToPharmacologyInteractions, TEND, DrugBank                    | 10567922, 11292635, 11443057, 11698253, 10831596                               |
| Icatibant             | BDKRB2  | Antagonist                     | TdgClinicalTrial, TEND, DrugBank, TTD                                                | 14514033, 11752352                                                             |
| Eflornithine          | ODC1    | Inhibitor, blocker, antagonist | TdgClinicalTrial, GuideToPharmacologyInteractions, DrugBank                          | 1730582                                                                        |
| Ustekinumab           | IL12B   | Inhibitor, antibody            | TdgClinicalTrial, ChemblInteractions, TEND, DrugBank, TTD, FDA                       | 17761156, 17979029, 27433311, 27306074                                         |
| Sulfapyrazone         | ABCC1   | Modulator, inhibitor           | TdgClinicalTrial, TEND, DrugBank, TTD                                                | 10727523, 9885294, 10917554, 11752352, 15044619, 9685354                       |
| Dyphylline            | PDE7B   | Inhibitor                      | TdgClinicalTrial, TEND, DrugBank                                                     | 17139284, 17016423                                                             |
| Pramlintide           | RAMP3   | Agonist                        | TdgClinicalTrial, GuideToPharmacologyInteractions, TEND, DrugBank                    | 15494035, 18593822, 11772274, 20357016, 20015292, 17139284, 19273748, 17016423 |
| Amcinonide            | ANXA1   | Agonist                        | TEND, DrugBank                                                                       | 7981624, 17139284, 17016423                                                    |
| Cladribine            | PNP     | Inducer                        | DrugBank                                                                             | 3260648, 10500836, 8521855, 6808516, 10444166                                  |
| Tiludronic acid       | PTPN1   | Inhibitor                      | TdgClinicalTrial, TEND, DrugBank                                                     | 9145236                                                                        |

Table SII. Continued.

| Drug                  | Gene    | Interaction type   | Source                                                                                | PMID                                                                                               |
|-----------------------|---------|--------------------|---------------------------------------------------------------------------------------|----------------------------------------------------------------------------------------------------|
| Oxglutamate           | GSR     | Inhibitor          | GuideToPharmacologyInteractions, ChemblInteractions, DrugBank                         | 17139284, 17016423                                                                                 |
| Carmustine            | GSR     | Inhibitor          | TdgClinicalTrial, ChemblInteractions, TEND, DrugBank                                  | 1312851, 3806383, 10378469, 1394620, 12477282, 15104113, 15321730, 6094175                         |
| Niacin                | NNMT    | Binder             | TdgClinicalTrial, DrugBank                                                            | 17139284, 18996527, 17016423                                                                       |
| Cinnarizine           | CACNA1S | Inhibitor          | DrugBank                                                                              | 1281221, 3530295                                                                                   |
| Nisoldipine           | CACNA1S | Blocker, inhibitor | ChemblInteractions, DrugBank                                                          | 16675661                                                                                           |
| Isradipine            | CACNA1S | Blocker, inhibitor | ChemblInteractions, DrugBank                                                          | 16675661                                                                                           |
| Nifedipine            | CACNA1S | Blocker, inhibitor | ChemblInteractions, DrugBank                                                          | 16675661                                                                                           |
| Nimodipine            | CACNA1S | Blocker, inhibitor | ChemblInteractions, DrugBank                                                          | 20661350, 17705883, 16675661, 20335610, 20334460, 19844625                                         |
| Verapamil             | CACNA1S | Inhibitor          | TdgClinicalTrial, TEND, DrugBank                                                      | 19125880                                                                                           |
| Nitrendipine          | CACNA1S | Inhibitor          | DrugBank                                                                              | 16675661                                                                                           |
| Clevidipine           | CACNA1S | Blocker            | TdgClinicalTrial, ChemblInteractions, DrugBank                                        | 15492770                                                                                           |
| Felodipine            | CACNA1S | Blocker, inhibitor | TdgClinicalTrial, ChemblInteractions, DrugBank                                        | 16675661                                                                                           |
| Sulindac              | MAPK3   | Inhibitor          | DrugBank                                                                              | 15548677, 16546990, 11245463, 12566304, 16138927                                                   |
| Arsenic trioxide      | MAPK3   | Inducer            | TdgClinicalTrial, DrugBank                                                            | 17158527, 12472888, 14516795, 14674888, 15849723                                                   |
| Triamterene           | SCNN1B  | Blocker, inhibitor | TdgClinicalTrial, ChemblInteractions, TEND, DrugBank                                  | 8772124, 11509829, 17139284, 17016423                                                              |
| Ribavirin             | IMPDH1  | Inhibitor          | GuideToPharmacologyInteractions, ChemblInteractions, DrugBank                         | 16293677, 16152757, 16421290, 11752352                                                             |
| Mycophenolate mofetil | IMPDH1  | Inhibitor          | TdgClinicalTrial, GuideToPharmacologyInteractions, ChemblInteractions, TEND, DrugBank | 17713475, 17463174, 11752352, 17139284, 17851563, 17016423                                         |
| Mercaptopurine        | IMPDH1  | Inhibitor          | DrugBank                                                                              | 11752352, 18506437                                                                                 |
| Mycophenolic acid     | IMPDH1  | Inhibitor          | TdgClinicalTrial, GuideToPharmacologyInteractions, ChemblInteractions, TEND, DrugBank | 16629948                                                                                           |
| Mexiletine            | AHR     | Agonist            | DrugBank                                                                              | 17327465                                                                                           |
| Flutamide             | AHR     | Agonist            | DrugBank                                                                              | 17327465                                                                                           |
| Leflunomide           | AHR     | Agonist            | DrugBank                                                                              | 20957046, 17327465                                                                                 |
| Nimodipine            | AHR     | Agonist            | DrugBank                                                                              | 17327465                                                                                           |
| Dextrothyroxine       | THRA    | Agonist            | ChemblInteractions, DrugBank                                                          | 14596673, 17315033, 12955882, 15283690, 15235154, 20615127, 11752352, 17139284, 17016423, 15240882 |
| Levocarnitine         | CPT1A   | Activator          | DrugBank                                                                              | 12705401, 15647998, 16362726, 11752352, 14711372, 16283381                                         |

Table SII. Continued.

| Drug                  | Gene  | Interaction type    | Source                                                                                                                                                                                                                     | PMID                                                                                                                                                                                                                                                                                                                                                                                                                                                                                                                                                                                                                                                                                                                                                                                                                                      |
|-----------------------|-------|---------------------|----------------------------------------------------------------------------------------------------------------------------------------------------------------------------------------------------------------------------|-------------------------------------------------------------------------------------------------------------------------------------------------------------------------------------------------------------------------------------------------------------------------------------------------------------------------------------------------------------------------------------------------------------------------------------------------------------------------------------------------------------------------------------------------------------------------------------------------------------------------------------------------------------------------------------------------------------------------------------------------------------------------------------------------------------------------------------------|
| Trastuzumab emtansine | ERBB2 | Inhibitor           | TdgClinicalTrial, OncoKB, CKB, ChembIInteractions, CGI, CIViC, FDA                                                                                                                                                         | 27900589, 17192538, 16091755, 23871490, 22257673, 28040715, 11248153, 24793816, 22149875, 28526536, 21768458, 24898067, 22153890, 10561337, 19786658, 20730488, 24879797, 21458915, 25789838, 23382472, 17591827, 23602601, 19060928, 21172893, 16236738, 23020162, 16452222, 16236737, 26920887                                                                                                                                                                                                                                                                                                                                                                                                                                                                                                                                          |
| Trastuzumab           | ERBB2 | Inhibitor, antibody | TALC, PharmGKB, ClarityFoundationBiomarkers, MyCancerGenome, TdgClinicalTrial, ClarityFoundationClinicalTrial, OncoKB, CKB, GuideToPharmacologyInteractions, ChembIInteractions, NCI, CGI, CIViC, DrugBank, DoCM, TTD, FDA | 27900589, 26619011, 17192538, 16091755, 17936563, 17216002, 23871490, 22257673, 19840887, 2013, 21676217, 26759238, 26598547, 24470511, 27687302, 28784859, 27140927, 11248153, 27108243, 22908275, 21107682, 18555254, 26880266, 15236790, 26296355, 22149875, 23801166, 15581051, 26469692, 22850551, 24691421, 25601188, 24606768, 24982373, 26104654, 17660958, 20728210, 11098307, 20975068, 21768458, 17679724, 27626067, 23948973, 26099744, 28167203, 23940356, 19289619, 23204226, 22153890, 24742739, 28539475, 15911866, 26245675, 10561337, 19786658, 20730488, 25693012, 11752352, 19874578, 20003286, 17591827, 25157968, 2605, 2320880, 21558396, 18690878, 25370464, 26432108, 23602601, 16397024, 19060928, 24300914, 16236738, 22493419, 27697991, 26243863, 16596213, 12525520, 23020162, 16452222, 16236737, 20124187 |



Table SII. Continued.

| Drug                          | Gene           | Interaction type                    | Source                                                                                                                                                                                     | PMID                          |
|-------------------------------|----------------|-------------------------------------|--------------------------------------------------------------------------------------------------------------------------------------------------------------------------------------------|-------------------------------|
| Pertuzumab                    | ERBB2          | Inhibitor, antibody                 | TALC, PharmGKB, ClarityFoundationBiomarkers, MyCancerGenome, TdgClinicalTrial, OncoKB, CKB, GuideToPharmacologyInteractions, ChemblInteractions, CGI, CIViC, DrugBank, TTD, FDA            | 17192538, 16091755, 23871490, |
|                               |                |                                     |                                                                                                                                                                                            | 22257673, 11248153, 22586653, |
|                               |                |                                     |                                                                                                                                                                                            | 22149875, 23801166, 21768458, |
|                               |                |                                     |                                                                                                                                                                                            | 23940356, 27052654, 22153890, |
|                               |                |                                     |                                                                                                                                                                                            | 28539475, 10561337, 19786658, |
|                               |                |                                     |                                                                                                                                                                                            | 20730488, 25693012, 17591827, |
|                               |                |                                     |                                                                                                                                                                                            | 15093539, 23602601, 19060928, |
|                               |                |                                     |                                                                                                                                                                                            | 16236738, 23020162, 16452222, |
|                               |                |                                     |                                                                                                                                                                                            | 16236737                      |
|                               |                |                                     |                                                                                                                                                                                            | 26545934, 16470840, 23220880, |
|                               |                |                                     |                                                                                                                                                                                            | 17638894, 16818711            |
|                               |                |                                     |                                                                                                                                                                                            | 27256378, 28830912            |
|                               |                |                                     |                                                                                                                                                                                            | Gefitinib                     |
| 27044931, 23632474, 24971884, |                |                                     |                                                                                                                                                                                            |                               |
| 22325357, 27923043, 25589492, |                |                                     |                                                                                                                                                                                            |                               |
| 23775486, 28363995, 23578997, |                |                                     |                                                                                                                                                                                            |                               |
| 26964772, 26559459, 23948973, |                |                                     |                                                                                                                                                                                            |                               |
| 28167203, 23816960, 22418700, |                |                                     |                                                                                                                                                                                            |                               |
| 18408761, 20142587, 25370464, |                |                                     |                                                                                                                                                                                            |                               |
| 26243863, 21617858, 26596672  |                |                                     |                                                                                                                                                                                            |                               |
| 26619011, 17192538, 20179222, |                |                                     |                                                                                                                                                                                            |                               |
| 16091755, 27595477, 12214266, |                |                                     |                                                                                                                                                                                            |                               |
| 24516025, 23871490, 22257673, |                |                                     |                                                                                                                                                                                            |                               |
| 20110044, 18413839, 27687302, |                |                                     |                                                                                                                                                                                            |                               |
| 27197158, 27140927, 11248153, |                |                                     |                                                                                                                                                                                            |                               |
| Ibrutinib<br>Afatimib         | ERBB2<br>ERBB2 | Inhibitor<br>Inhibitor<br>Inhibitor | CKB, GuideToPharmacologyInteractions<br>TALC, MyCancerGenome, TdgClinicalTrial, OncoKB, CKB,<br>GuideToPharmacologyInteractions, CGI, CIViC, DrugBank,<br>MyCancerGenomeClinicalTrial, TTD | 15374980, 26270481, 27108243, |
|                               |                |                                     |                                                                                                                                                                                            | 22908275, 24971884, 14633707, |
|                               |                |                                     |                                                                                                                                                                                            | 22586653, 27760111, 26296355, |
|                               |                |                                     |                                                                                                                                                                                            | 22149875, 2015169, 18774637,  |
|                               |                |                                     |                                                                                                                                                                                            | 27450453, 16894399, 27900369, |
|                               |                |                                     |                                                                                                                                                                                            | 21768458, 23948973, 14751502, |
|                               |                |                                     |                                                                                                                                                                                            | 27026198, 23940356, 25398453, |
|                               |                |                                     |                                                                                                                                                                                            | 22153890, 24868024, 26245675, |
|                               |                |                                     |                                                                                                                                                                                            | 10561337, 19786658, 20730488, |
|                               |                |                                     |                                                                                                                                                                                            | 12467226, 26811533, 11752352, |
|                               |                |                                     |                                                                                                                                                                                            | 14737100, 18803986, 19791830, |
|                               |                |                                     |                                                                                                                                                                                            | 17591827, 25157968, 15163842, |
|                               |                |                                     |                                                                                                                                                                                            | Lapatinib                     |

Table SII. Continued.

| Drug                   | Gene    | Interaction type      | Source                                                                                                                                      | PMID                                                                                                                                                                                                                                                                                                       |
|------------------------|---------|-----------------------|---------------------------------------------------------------------------------------------------------------------------------------------|------------------------------------------------------------------------------------------------------------------------------------------------------------------------------------------------------------------------------------------------------------------------------------------------------------|
| Pramlintide            | RAMP2   | Agonist               | TdgClinicalTrial, TEND, DrugBank                                                                                                            | 22046346, 23220880, 25435280, 26432108, 23602601, 23950206, 16397024, 19060928, 26487584, 25221644, 16236738, 20658522, 22493419, 27697991, 26243863, 23020162, 16452222, 14967461, 16236737, 25238247, 20124187, 25694417, 26628478, 26920887, 15494035, 18593822, 20015292, 17139284, 19273748, 17016423 |
| Fingolimod             | SIPR5   | modulator             | DrugBank                                                                                                                                    | 23579456, 23579459                                                                                                                                                                                                                                                                                         |
| Chlormerodin           | ALDH5A1 | Inhibitor             | DrugBank                                                                                                                                    | 5692397, 11752352, 17139284, 17016423                                                                                                                                                                                                                                                                      |
| Blinatumomab           | CD19    | Activator, antibody   | TdgClinicalTrial, GuideToPharmacologyInteractions, ChembIInteractions, DrugBank                                                             | 25883042                                                                                                                                                                                                                                                                                                   |
| Zonisamide             | SCN3B   | Inhibitor             | TdgClinicalTrial, DrugBank                                                                                                                  | 19557119, 20001433, 19948168, 15511691, 20025128, 14704463, 18433351                                                                                                                                                                                                                                       |
| Botulinum toxin type B | VAMP2   | Inhibitor, binder     | TdgClinicalTrial, ChembIInteractions, TEND, DrugBank                                                                                        | 14573702, 11752352                                                                                                                                                                                                                                                                                         |
| Bosutinib              | CAMK2G  | Inhibitor             | GuideToPharmacologyInteractions, DrugBank                                                                                                   | 23493838                                                                                                                                                                                                                                                                                                   |
| Dasatinib              | PDGFRB  | Inhibitor, antagonist | TdgClinicalTrial, ChembIInteractions, TEND, DrugBank, MyCancerGenomeClinicalTrial                                                           | 20072833, 16497876, 16436588                                                                                                                                                                                                                                                                               |
| Becaplermin            | PDGFRB  | Agonist               | TdgClinicalTrial, ChembIInteractions, TEND, DrugBank                                                                                        | 18686746                                                                                                                                                                                                                                                                                                   |
| Sunitinib              | PDGFRB  | Inhibitor             | TALC, MyCancerGenome, TdgClinicalTrial, GuideToPharmacologyInteractions, TEND, DrugBank                                                     | 16425993, 12538485, 14753710, 12748309, 15557593                                                                                                                                                                                                                                                           |
| Sorafenib              | PDGFRB  | Inhibitor, antagonist | TEND, DrugBank<br>TALC, MyCancerGenome, TdgClinicalTrial, ClarityFoundationClinicalTrial,                                                   | 16425993, 17545544, 17619763                                                                                                                                                                                                                                                                               |
| Pazopanib              | PDGFRB  | Inhibitor             | TEND, DrugBank, MyCancerGenomeClinicalTrial<br>TALC, MyCancerGenome, GuideToPharmacologyInteractions, DrugBank, MyCancerGenomeClinicalTrial | 17288876                                                                                                                                                                                                                                                                                                   |
| Imatinib               | PDGFRB  | Inhibitor             | MyCancerGenome, TdgClinicalTrial, OncoKB, CGI, CIVIC, TEND, FDA                                                                             | 15116603, 12676775, 23835704, 22897847, 24687085, 21128251, 12181402, 15746584, 15503291, 19620561, 18950453, 24963404, 16960151, 15681532, 14504092, 20439456                                                                                                                                             |
| Ketoconazole           | AR      | Binder                | DrugBank                                                                                                                                    | 1526623                                                                                                                                                                                                                                                                                                    |

Table SII. Continued.

| Drug                      | Gene | Interaction type      | Source                                                                                                     | PMID                                                                                            |
|---------------------------|------|-----------------------|------------------------------------------------------------------------------------------------------------|-------------------------------------------------------------------------------------------------|
| Methyltestosterone        | AR   | Agonist               | TdgClinicalTrial, GuideToPharmacologyInteractions, ChembIInteractions, DrugBank                            | 17086931, 17084172, 17128417, 17322500, 17202804, 11752352                                      |
| Danazol                   | AR   | Agonist               | ChembIInteractions, DrugBank                                                                               | 9593936, 2404115, 2486535, 10882672, 18061638                                                   |
| Drospirenone              | AR   | Antagonist            | TdgClinicalTrial, DrugBank                                                                                 | 11024226                                                                                        |
| Nandrolone phenpropionate | AR   | Agonist               | ChembIInteractions, DrugBank                                                                               | 12760377, 17405825, 14761877, 11752352, 14619588, 14663936                                      |
| Prasterone                | AR   | Agonist               | TdgClinicalTrial, DrugBank                                                                                 | 15994348                                                                                        |
| Nilutamide                | AR   | Antagonist            | TdgClinicalTrial, GuideToPharmacologyInteractions, ChembIInteractions, CIViC, TEND, DrugBank, TTD          | 12497018, 26000489, 3320565, 16986000, 3071951, 20541672, 11752352, 12497048, 12496872, 6374639 |
| Flutamide                 | AR   | Antagonist            | TdgClinicalTrial, GuideToPharmacologyInteractions, ChembIInteractions, CGI, CIViC, TEND, DrugBank, TTD     | 11162924, 26000489, 10822172, 10500149, 10752671, 12231070, 11752352, 10879806                  |
| Levonogestrel             | AR   | Agonist               | DrugBank                                                                                                   | 14672731, 19836445, 3139361, 19833195                                                           |
| Testosterone propionate   | AR   | Agonist               | GuideToPharmacologyInteractions, ChembIInteractions, DrugBank                                              | 17086931, 17084172, 17128417, 17322500, 17202804, 12604714                                      |
| Oxymetholone              | AR   | Activator, agonist    | ChembIInteractions, DrugBank                                                                               | 16633980                                                                                        |
| Enzalutamide              | AR   | Antagonist, inhibitor | TdgClinicalTrial, GuideToPharmacologyInteractions, ChembIInteractions, CGI, CIViC, DrugBank, CancerCommons | 23779130, 25184630                                                                              |
| Nandrolone decanoate      | AR   | Agonist               | ChembIInteractions, DrugBank                                                                               | 18809391                                                                                        |
| Bicalutamide              | AR   | Antagonist            | TdgClinicalTrial, GuideToPharmacologyInteractions, ChembIInteractions, CGI, CIViC, TEND, DrugBank, TTD     | 12517791, 26000489, 10754148, 10500149, 11752352, 10076535, 11931851                            |
| Cyproterone acetate       | AR   | Antagonist            | GuideToPharmacologyInteractions, CIViC                                                                     | 26000489                                                                                        |
| Spirolactone              | AR   | Antagonist            | DrugBank                                                                                                   | 18819053                                                                                        |
| Fluoxymesterone           | AR   | Agonist               | TdgClinicalTrial, GuideToPharmacologyInteractions, ChembIInteractions, TEND, DrugBank, TTD                 | 8119180, 6439037, 2521824, 17023534, 11752352, 10077001                                         |
| Oxandrolone               | AR   | Agonist               | TdgClinicalTrial, ChembIInteractions, TEND, DrugBank, TTD                                                  | 15219414, 17364004, 11752352, 20230007, 11392377                                                |
| Norgestrel                | AR   | Agonist               | DrugBank                                                                                                   | 3139361                                                                                         |
| Amodiaquine               | HNMT | Inhibitor             | DrugBank                                                                                                   | 6789797, 1203620, 17222819, 11752352                                                            |
| Enalapril maleate         | ACE  | Inhibitor             | ChembIInteractions, NCI                                                                                    | 3038326                                                                                         |
| Spirapril                 | ACE  | Inhibitor             | TdgClinicalTrial, GuideToPharmacologyInteractions, TEND, DrugBank                                          | 11929321, 16126915, 12613273, 11752352, 20524801                                                |

Table SII. Continued.

| Drug         | Gene  | Interaction type | Source                                                                                               | PMID                                                                                                                                                                                        |
|--------------|-------|------------------|------------------------------------------------------------------------------------------------------|---------------------------------------------------------------------------------------------------------------------------------------------------------------------------------------------|
| Lisinopril   | ACE   | Inhibitor        | PharmGKB, TdgClinicalTrial, GuideToPharmacologyInteractions, TEND, DrugBank                          | 11030016, 11929321, 17618628, 9506845, 11752352                                                                                                                                             |
| Cilazapril   | ACE   | Inhibitor        | TdgClinicalTrial, GuideToPharmacologyInteractions, TEND, DrugBank                                    | 10398211, 10205231, 1382157, 1382161, 11752352, 10446934, 18423812                                                                                                                          |
| Ramipril     | ACE   | Inhibitor        | TdgClinicalTrial, GuideToPharmacologyInteractions, ChEMBLInteractions, TEND, DrugBank                | 11030016, 11929321, 16398929, 11752352                                                                                                                                                      |
| Rescinnamine | ACE   | Inhibitor        | TdgClinicalTrial, TEND, DrugBank                                                                     | 16431399, 11752352, 17139284, 17016423                                                                                                                                                      |
| Trandolapril | ACE   | Inhibitor        | TdgClinicalTrial, GuideToPharmacologyInteractions, ChEMBLInteractions, TEND, DrugBank                | 11030016, 11929321, 11752352                                                                                                                                                                |
| Captopril    | ACE   | Inhibitor        | PharmGKB, TdgClinicalTrial, GuideToPharmacologyInteractions, ChEMBLInteractions, NCI, TEND, DrugBank | 2839262, 16889963, 2442780, 3937925, 11030016, 11929321, 3320343, 17618628, 3325392, 3038284, 15236580, 20014331, 7042175, 6275810, 11752352, 12424228, 12489813, 2875891, 9863143, 8864563 |
| Liraglutide  | GLP1R | Agonist          | TdgClinicalTrial, GuideToPharmacologyInteractions, ChEMBLInteractions, TEND, DrugBank, TTD           | 14678021, 18333889                                                                                                                                                                          |
| Albiglutide  | GLP1R | Agonist          | TdgClinicalTrial, ChEMBLInteractions, DrugBank                                                       | 25136065                                                                                                                                                                                    |
| Exenatide    | GLP1R | Binder, agonist  | TdgClinicalTrial, ChEMBLInteractions, TEND, DrugBank, TTD                                            | 16627399, 16722815, 17292977, 15700891, 20649595, 16341288, 11752352, 15495988, 17353295, 16534527, 15331551, 17379930                                                                      |
| Glucagon     | GLP1R | Agonist          | GuideToPharmacologyInteractions, DrugBank                                                            | 17475961, 17498508, 12529935, 17534934                                                                                                                                                      |
| Dulaglutide  | GLP1R | Agonist          | ChEMBLInteractions, DrugBank                                                                         | 25367716                                                                                                                                                                                    |
| Flucytosine  | DNMT1 | other            | DrugBank                                                                                             | 17897676, 17139284, 17016423, 8441637                                                                                                                                                       |
| Decitabine   | DNMT1 | Inhibitor        | TdgClinicalTrial, ChEMBLInteractions, CIViC, TEND, DrugBank                                          | 16015501, 20072836, 11688997, 25968887, 11259619, 18398832, 11352938, 11752352, 11069027, 12907443, 17023173, 18425818                                                                      |
| Azacitidine  | DNMT1 | Inhibitor        | TdgClinicalTrial, ChEMBLInteractions, NCI, TEND, DrugBank                                            | 2443243, 12011120, 11700387, 17612710, 20126405, 6173384, 14585280, 15793220, 11752352, 18627335, 19589026, 16341239                                                                        |

Table SII. Continued.

| Drug              | Gene   | Interaction type                | Source                                                                                                                                                                                                                                      | PMID                                                                                               |
|-------------------|--------|---------------------------------|---------------------------------------------------------------------------------------------------------------------------------------------------------------------------------------------------------------------------------------------|----------------------------------------------------------------------------------------------------|
| Sorafenib         | KDR    | Inhibitor, antagonist           | TALC, MyCancerGenome, TdgClinicalTrial, ClarityFoundationClinicalTrial, CKB, GuideToPharmacologyInteractions, CIViC, TEND, DrugBank, MyCancerGenomeClinicalTrial                                                                            | 16824050, 16418310, 16503817, 16757355, 16446323, 19723655                                         |
| Cabozantinib      | KDR    | Inhibitor, antagonist           | TALC, MyCancerGenome, TdgClinicalTrial, ClarityFoundationClinicalTrial, GuideToPharmacologyInteractions, DrugBank, TTD                                                                                                                      | 21606412, 21926191                                                                                 |
| Pazopanib         | KDR    | Inhibitor                       | TALC, MyCancerGenome, TdgClinicalTrial, GuideToPharmacologyInteractions, DrugBank, MyCancerGenomeClinicalTrial, TTD                                                                                                                         | 17288876                                                                                           |
| Axitinib          | KDR    | Inhibitor                       | TALC, PharmGKB, MyCancerGenome, TdgClinicalTrial, GuideToPharmacologyInteractions, ChemblInteractions, DrugBank, CancerCommons, MyCancerGenomeClinicalTrial, TTD                                                                            | 18541897                                                                                           |
| Ramucirumab       | KDR    | Inhibitor, antagonist, antibody | TALC, MyCancerGenome, TdgClinicalTrial, CKB, GuideToPharmacologyInteractions, ChemblInteractions, DrugBank                                                                                                                                  | 20048182, 2182794                                                                                  |
| Sunitinib         | KDR    | Inhibitor                       | GuideToPharmacologyInteractions, ChemblInteractions, DrugBank, TALC, MyCancerGenome, TdgClinicalTrial, CKB, MyCancerGenome, TdgClinicalTrial, CKB, GuideToPharmacologyInteractions, CIViC, TEND, DrugBank, MyCancerGenomeClinicalTrial, TTD | 27149458, 20142593, 16418310, 16533791, 12538485, 14753710, 11752352, 28011623, 19723655, 12873999 |
| Ponatinib         | KDR    | Inhibitor                       | MyCancerGenome, DrugBank                                                                                                                                                                                                                    | 19878872                                                                                           |
| Vandetanib        | KDR    | Inhibitor                       | TALC, MyCancerGenome, TdgClinicalTrial, ClarityFoundationClinicalTrial, CKB, GuideToPharmacologyInteractions, ChemblInteractions, MyCancerGenomeClinicalTrial, TTD                                                                          | 26578684                                                                                           |
| Nintedanib        | KDR    | Inhibitor, inhibitor            | TALC, MyCancerGenome, TdgClinicalTrial, ClarityFoundationClinicalTrial, GuideToPharmacologyInteractions, DrugBank                                                                                                                           | 18559524                                                                                           |
| Regorafenib       | KDR    | Inhibitor                       | TALC, MyCancerGenome, TdgClinicalTrial, CKB, GuideToPharmacologyInteractions, ChemblInteractions, DrugBank, MyCancerGenomeClinicalTrial                                                                                                     | 27004155                                                                                           |
| Tirofiban         | ITGA2B | Antagonist                      | PharmGKB, TdgClinicalTrial, TEND, DrugBank                                                                                                                                                                                                  | 11929319, 11565896, 12057986, 20210689, 11342206, 11076818                                         |
| Abciximab         | ITGA2B | Inhibitor, antagonist           | PharmGKB, TdgClinicalTrial, ChemblInteractions, TEND, DrugBank                                                                                                                                                                              | 18510478, 12749745, 19499855                                                                       |
| Dalfampridine     | KCNA2  | Antagonist, blocker             | ChemblInteractions, DrugBank                                                                                                                                                                                                                | 16472864                                                                                           |
| Paclitaxel        | TUBB1  | Binder, inhibitor               | TdgClinicalTrial, ChemblInteractions, TEND, DrugBank, TTD                                                                                                                                                                                   | 17314054, 19575780, 17139284, 17016423, 1350385                                                    |
| Eribulin mesylate | TUBB1  | Inhibitor                       | ChemblInteractions, DrugBank                                                                                                                                                                                                                | 16940412                                                                                           |
| Colchicine        | TUBB1  | Inhibitor                       | ChemblInteractions, DrugBank                                                                                                                                                                                                                | 20814887, 20586571, 17139284, 17016423, 19527023, 15720245                                         |
| Vindesine         | TUBB1  | Binder, inhibitor               | TdgClinicalTrial, TEND, DrugBank, TTD                                                                                                                                                                                                       | 17878523, 17465195, 10920282, 17139284, 17016423                                                   |
| Vinblastine       | TUBG1  | Adduct                          | DrugBank                                                                                                                                                                                                                                    | 9664292, 1818332, 18220533, 15579115, 14619954                                                     |

Table SII. Continued.

| Drug                        | Gene   | Interaction type            | Source                                                                                                          | PMID                                                                          |
|-----------------------------|--------|-----------------------------|-----------------------------------------------------------------------------------------------------------------|-------------------------------------------------------------------------------|
| Amoxapine                   | SLC6A4 | Inhibitor                   | TdgClinicalTrial, GuideToPharmacologyInteractions, TEND, DrugBank                                               | 9537821, 7984281                                                              |
| Cocaine                     | SLC6A4 | Inhibitor                   | TdgClinicalTrial, TEND, DrugBank                                                                                | 8302852, 15351386, 12057823, 9537821, 10366604                                |
| Chlorpheniramine polistirex | SLC6A4 | Inhibitor                   | DrugBank                                                                                                        | 9537821                                                                       |
| Mirtazapine                 | SLC6A4 | Binder                      | DrugBank                                                                                                        | 9537821, 15771415                                                             |
| Amphetamine                 | SLC6A4 | Binder                      | DrugBank                                                                                                        | 17209801                                                                      |
| Vortioxetine                | SLC6A4 | Inhibitor; inhibitor        | TdgClinicalTrial, GuideToPharmacologyInteractions, DrugBank                                                     | 21486038                                                                      |
| Butriptyline                | SLC6A4 | Inhibitor; antagonist       | DrugBank                                                                                                        | 3816971, 6086881, 9537821                                                     |
| Mianserin                   | SLC6A4 | Inhibitor                   | DrugBank                                                                                                        | 9537821                                                                       |
| Mazindol                    | SLC6A4 | Inhibitor                   | DrugBank                                                                                                        | 9537821                                                                       |
| Fluoxetine                  | SLC6A4 | Inhibitor                   | PharmGKB, TdgClinicalTrial, GuideToPharmacologyInteractions,                                                    | 17289086, 11487610, 9537821, 11752352, 17215106, 17356573, 17335951, 17486443 |
| Tapentadol                  | SLC6A4 | Inhibitor                   | NCI, TEND, DrugBank                                                                                             | 22698264                                                                      |
| Tositumomab                 | MS4A1  | Inhibitor; antibody         | DrugBank                                                                                                        | 22698264                                                                      |
|                             |        |                             | TdgClinicalTrial, GuideToPharmacologyInteractions, ChEMBLInteractions, TEND, DrugBank, TTD                      | 11418316, 14748653, 11879282, 12899647, 11752352, 15023434, 13129395          |
| Obinutuzumab                | MS4A1  | Inhibitor; antibody         | TdgClinicalTrial, GuideToPharmacologyInteractions, ChEMBLInteractions, DrugBank, TTD, FDA                       | 19513948                                                                      |
| Rituximab                   | MS4A1  | Inhibitor; antibody         | MyCancerGenome, TdgClinicalTrial, GuideToPharmacologyInteractions, ChEMBLInteractions, TEND, DrugBank, TTD, FDA | 20350667, 11752352, 20350663                                                  |
| Ibritumomab tiuxetan        | MS4A1  | antibody                    | MyCancerGenome, TdgClinicalTrial, GuideToPharmacologyInteractions, DrugBank                                     | 11418316, 15045033, 11879282, 20113680, 11752352, 12011122, 10541376          |
| Ofatumumab                  | MS4A1  | Inhibitor; antibody         | MyCancerGenome, TdgClinicalTrial, GuideToPharmacologyInteractions, ChEMBLInteractions, DrugBank, TTD            | 19427037, 18388516, 17768100                                                  |
| Dofetilide                  | KCNK2  | Inhibitor                   | TdgClinicalTrial, TEND, DrugBank                                                                                | 17187453, 17139284, 17016423                                                  |
| Dronedarone                 | KCNK2  | Inhibitor                   | DrugBank                                                                                                        | 22790794                                                                      |
| Vortioxetine                | ADRB1  | Ligand                      | DrugBank                                                                                                        | 21486038                                                                      |
| Oxprenolol                  | ADRB1  | Antagonist                  | TdgClinicalTrial, TEND, DrugBank, TTD                                                                           | 6202960, 6124492, 2871880, 11752352, 17139284, 17016423                       |
| Norepinephrine              | ADRB1  | Agonist                     | PharmGKB, DrugBank                                                                                              | 9464897, 18064417, 11752352, 19110970                                         |
| Cabergoline                 | ADRB1  | Binder                      | DrugBank                                                                                                        | 12388666                                                                      |
| Penbutolol                  | ADRB1  | Antagonist, partial agonist | TdgClinicalTrial, TEND, DrugBank                                                                                | 11738481, 6755764, 11224195, 2189902                                          |

Table SII. Continued.

| Drug          | Gene  | Interaction type | Source                                                    | PMID                                                       |
|---------------|-------|------------------|-----------------------------------------------------------|------------------------------------------------------------|
| Isoetharine   | ADRB1 | Agonist          | TdgClinicalTrial, TEND, DrugBank                          | 17157779, 15917856, 17628611, 16973691, 17329986           |
| Levobunolol   | ADRB1 | Antagonist       | TdgClinicalTrial, TEND, DrugBank                          | 11572462, 10864881, 1351412, 2891463, 7928182, 2892662     |
| Clenbuterol   | ADRB1 | Agonist          | DrugBank                                                  | 20590599                                                   |
| Amphetamine   | ADRB1 | Agonist          | DrugBank                                                  | 6245760, 4399738                                           |
| Practolol     | ADRB1 | Antagonist       | TdgClinicalTrial, TEND, DrugBank, TTD                     | 2871880, 6524278, 30388, 2857116, 11752352                 |
| Nebivolol     | ADRB1 | Antagonist       | TdgClinicalTrial, TEND, DrugBank, TTD                     | 11752352, 17661735, 16961165                               |
| Nadolol       | ADRB1 | Antagonist       | TdgClinicalTrial, ChemblInteractions, TEND, DrugBank      | 10606440, 1354084, 7912539, 7981009, 10433496, 11752352    |
| Bethanidine   | ADRB1 | Antagonist       | DrugBank                                                  | 6114720, 6812406, 11752352                                 |
| Propranolol   | ADRB1 | Antagonist       | TdgClinicalTrial, TEND, DrugBank                          | 15236843, 14757703, 17628611, 17572694, 11752352, 16177222 |
| Carvedilol    | ADRB1 | Antagonist       | TdgClinicalTrial, ChemblInteractions, TEND, DrugBank      | 2575762, 1712335, 7908256, 2577144                         |
| Atenolol      | ADRB1 | Antagonist       | TdgClinicalTrial, ChemblInteractions, TEND, DrugBank, TTD | 9300315, 17628611, 11752352, 12065078, 10913016            |
| Pirbuterol    | ADRB1 | Agonist          | DrugBank                                                  | 2901958, 6143816                                           |
| Mirtazapine   | ADRB1 | Binder           | DrugBank                                                  | 10762339                                                   |
| Pindolol      | ADRB1 | Partial agonist  | TdgClinicalTrial, ChemblInteractions, TEND, DrugBank      | 14608456, 2907348, 2148726, 8884690, 11752352, 1687398     |
| Arbutamine    | ADRB1 | Agonist          | TdgClinicalTrial, TEND, DrugBank                          | 8723169, 17139284, 17016423                                |
| Celiprolol    | ADRB1 | Antagonist       | DrugBank                                                  | 18636069, 17384462, 17141277                               |
| Mephentermine | ADRB1 | Agonist          | DrugBank                                                  | 21182601                                                   |
| Droxidopa     | ADRB1 | Agonist          | ChemblInteractions, DrugBank                              | 9464897, 18064417, 19110970                                |
| EZETIMIBE     | ANPEP | Other            | DrugBank                                                  | 15494415                                                   |
| Icatibant     | ANPEP | Inhibitor        | DrugBank                                                  | 17026984                                                   |
| Ceruletide    | CCKAR | Inducer          | TdgClinicalTrial, TEND, DrugBank                          | 8182534, 1620654, 3440035, 2087492, 2587420, 1356589       |
